# Supplementary material for: Plasmon Assisted Highly Efficient Visible Light Catalytic CO2 Reduction Over the Noble Metal Decorated Sr-Incorporated g-C3N4
Source: PubMed Central journal article supplement (PMC8521553; doi:10.1007/s40820-021-00736-x), 2021-10-15
Supplement: 40820_2021_736_MOESM1_ESM.pdf [file 40820_2021_736_MOESM1_ESM.pdf]

Supporting Information for

# **Plasmon Assisted Highly Efficient Visible Light Catalytic CO<sub>2</sub> Reduction Over the Noble Metal Decorated Sr-Incorporated g-C<sub>3</sub>N<sub>4</sub>**

Muhammad Humayun<sup>1</sup>, Habib Ullah<sup>2</sup>, Lang Shu<sup>1</sup>, Xiang Ao<sup>1</sup>, Asif Ali Tahir<sup>2</sup>,  
Chungdong Wang<sup>1,\*</sup>, and Wei Luo<sup>1,\*</sup>

<sup>1</sup>School of Optical and Electronic Information, Wuhan National Laboratory for Optoelectronics, Engineering Research Center for Functional Ceramics of the Ministry of Education, Huazhong University of Science and Technology, Wuhan 430074, P. R. China

<sup>2</sup>Environment and Sustainability Institute, University of Exeter, Penryn, TR10 9FE Cornwall, United Kingdom

\*Corresponding authors. E-mails: [apcdwang@hust.edu.cn](mailto:apcdwang@hust.edu.cn) (Chungdong Wang);  
[luowei@mail.hust.edu.cn](mailto:luowei@mail.hust.edu.cn) (Wei Luo)

## Supplementary Figures and Tables

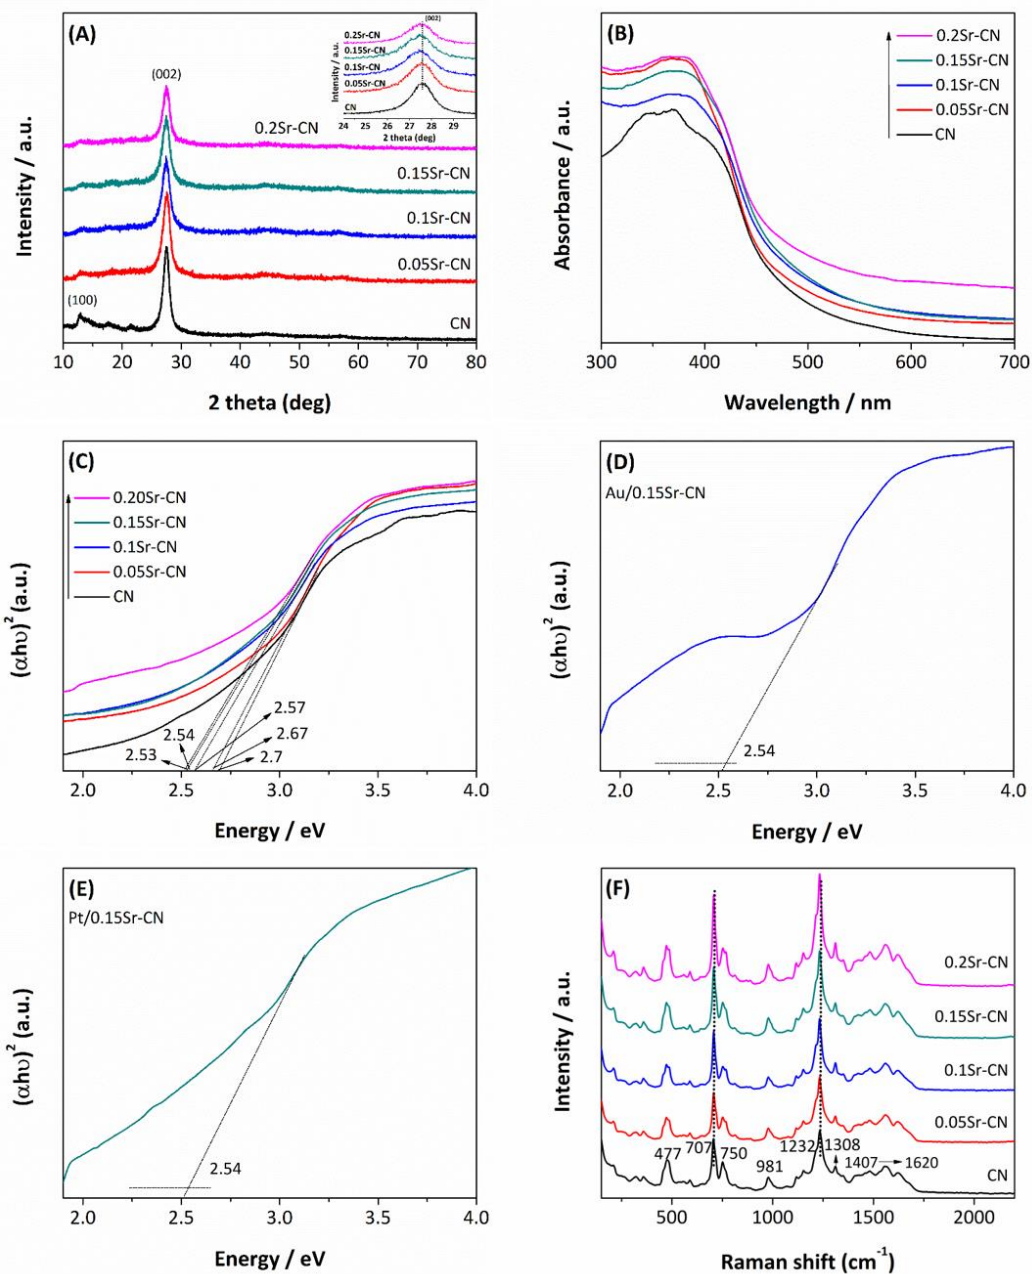

**Fig. S1** XRD patterns (a), UV-vis absorption spectra (b) and the calculated energy band gaps (c) of CN and  $x$ Sr-CN samples. Calculated energy band gaps (d) of Au/0.15Sr-CN and (e) of Pt/0.15Sr-CN sample. Raman spectra of the CN and  $x$ Sr-CN samples (f)

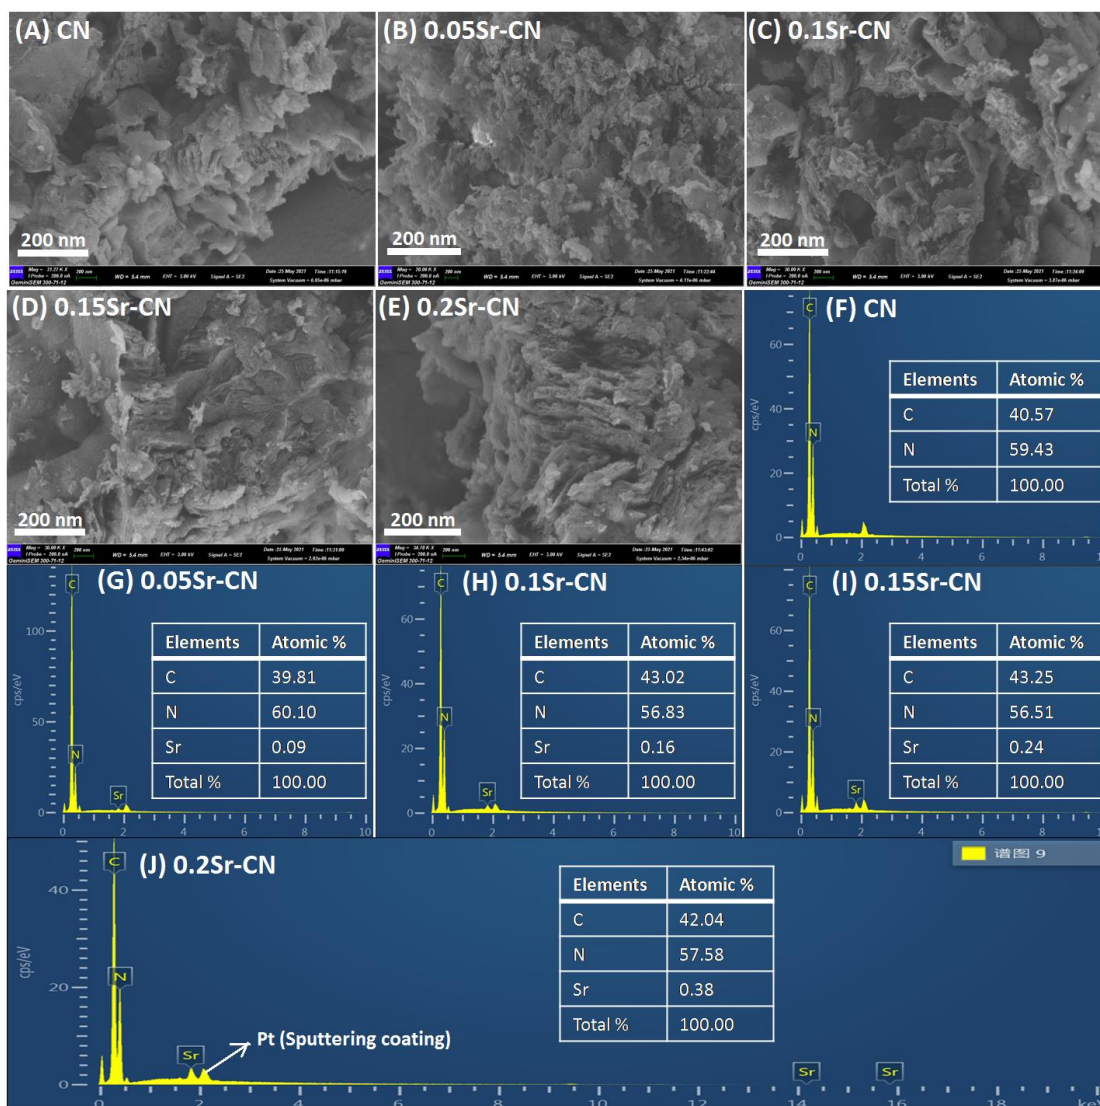

**Fig. S2** Scanning electron microscopy (SEM) micrographs (a) of CN, (b) of 0.05Sr-CN, (c) of 0.1Sr-CN, (d) of 0.15Sr-CN and (e) of 0.2Sr-CN. Energy dispersive X-ray spectroscopy (EDX) spectra: (f) of CN, (g) of 0.05Sr-CN, (h) of 0.1Sr-CN, (i) of 0.15Sr-CN and (j) of 0.2Sr-CN samples with atomic percentage of each element as inset

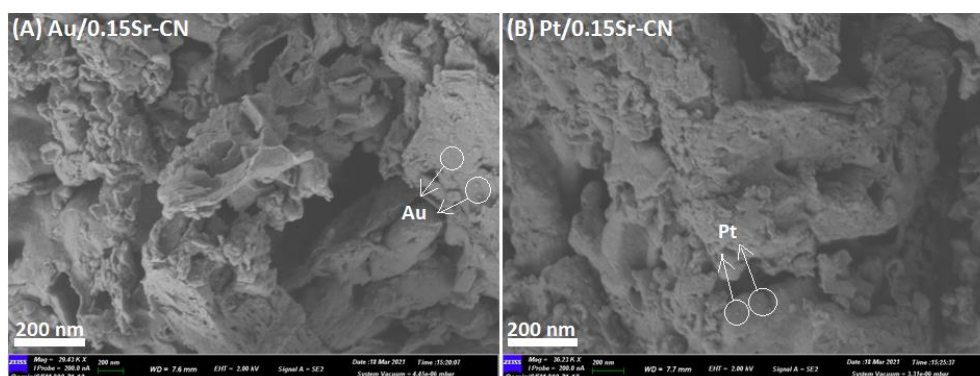

**Fig. S3** SEM micrographs; (a) of Au/0.15Sr-CN, and (b) of Pt/0.15Sr-CN samples

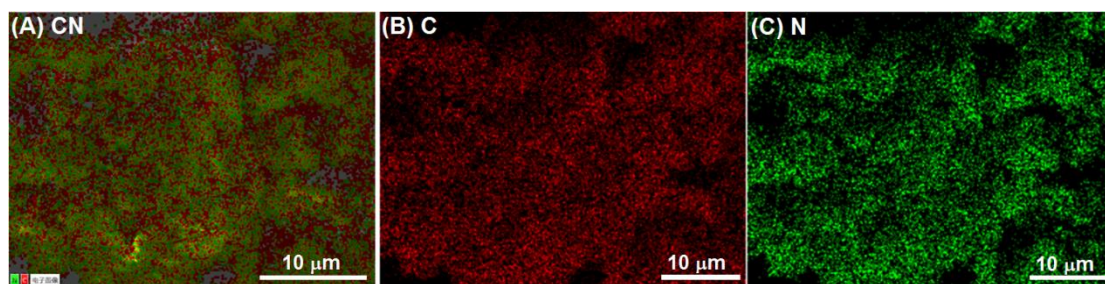

**Fig. S4** Energy Dispersive X-ray Spectra (EDS) mappings of (a) CN, (b) C element and (c) N element

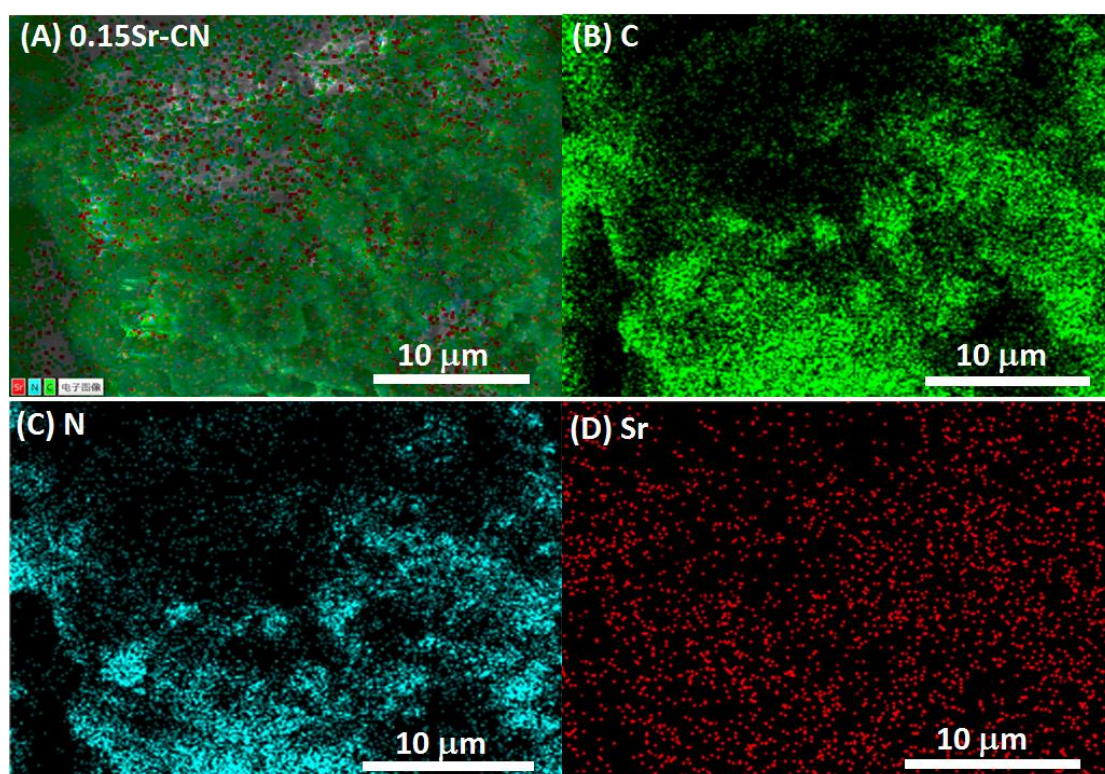

**Fig. S5** Energy Dispersive X-ray Spectra (EDS) mappings of (a) 0.15Sr-CN, (b) C element, (c) N element and (d) Sr element

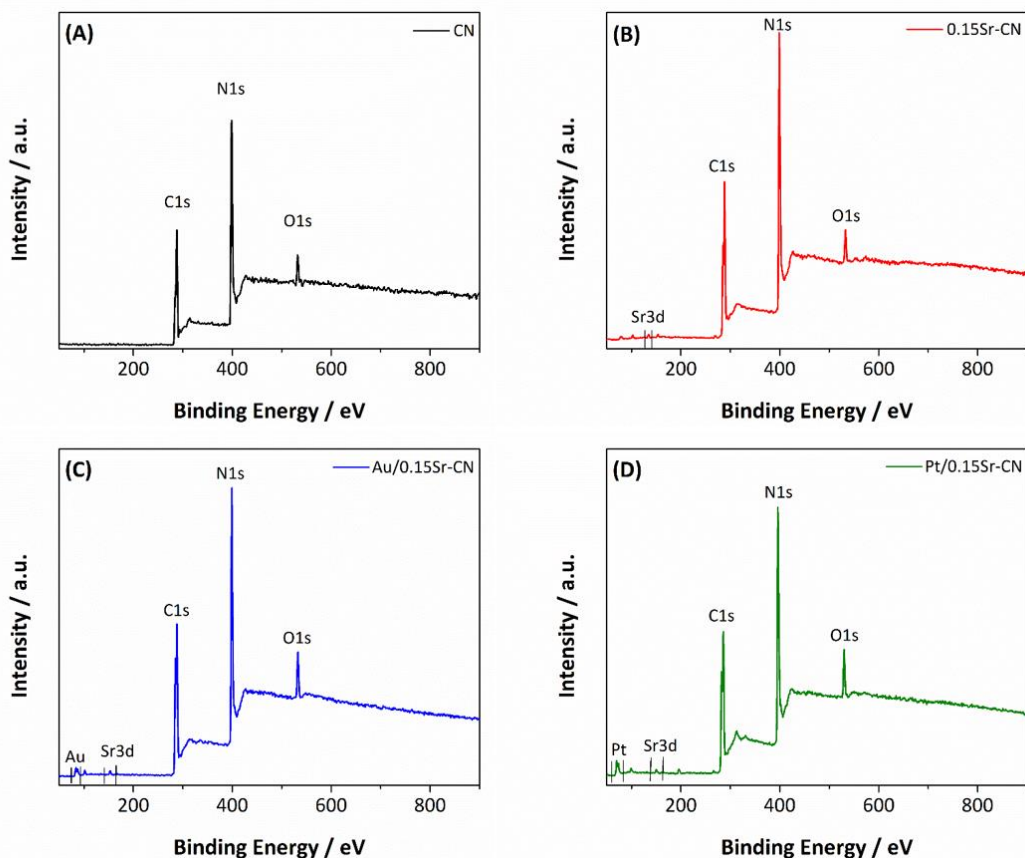

**Fig. S6** XPS survey spectra (a) of CN, (b) of 0.15Sr-CN, (c) of Au/0.15Sr-CN and (d) of Pt/0.15Sr-CN

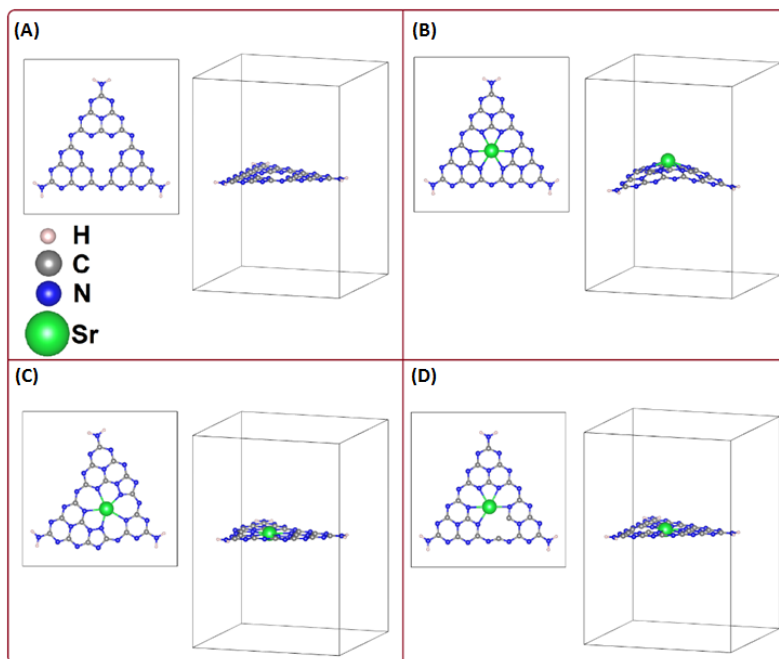

**Fig. S7** Optimized relaxed structure of CN (a), 0.15Sr-CN (Interstitial site) doping (b), 0.15Sr-CN (C-substituted) doping (c), and 0.15Sr-CN (N-substituted) doping (d)

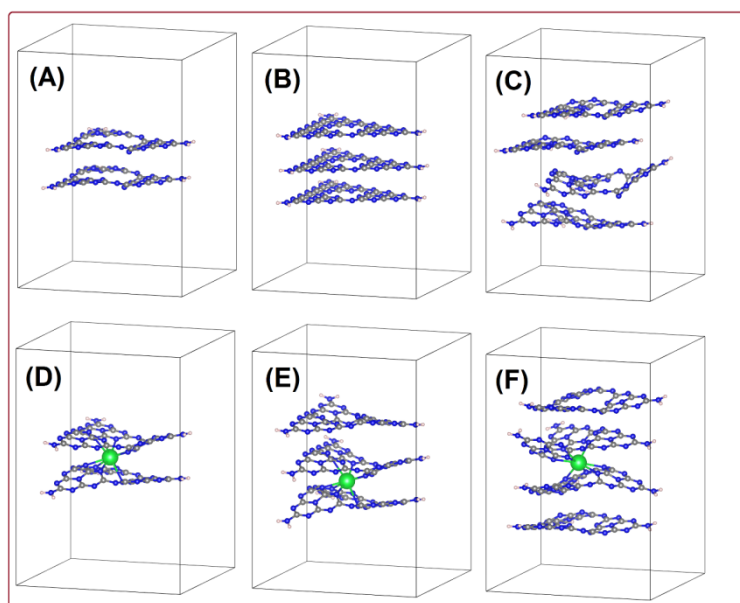

**Fig. S8** The optimized relaxed structure of two layers (a), three layers (b), four layers (c), and Sr-incorporated two layers (d), Sr-incorporated three layers (e), and Sr-incorporated four layers of CN (f)

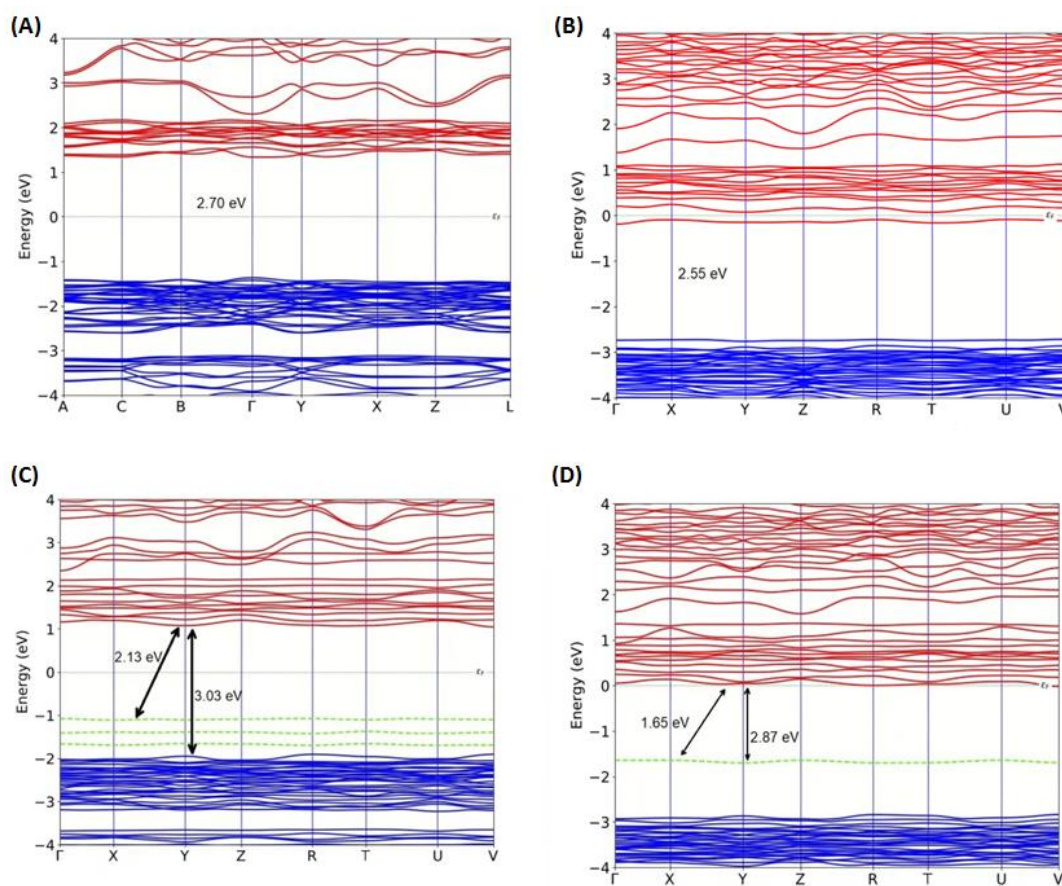

**Fig. S9** DFT calculated band structures of CN (a), of 0.15Sr-CN (Interstitial site) doping (b), of 0.15Sr-CN (C-substituted) doping (c), and of 0.15Sr-CN (N-substituted) doping (d)

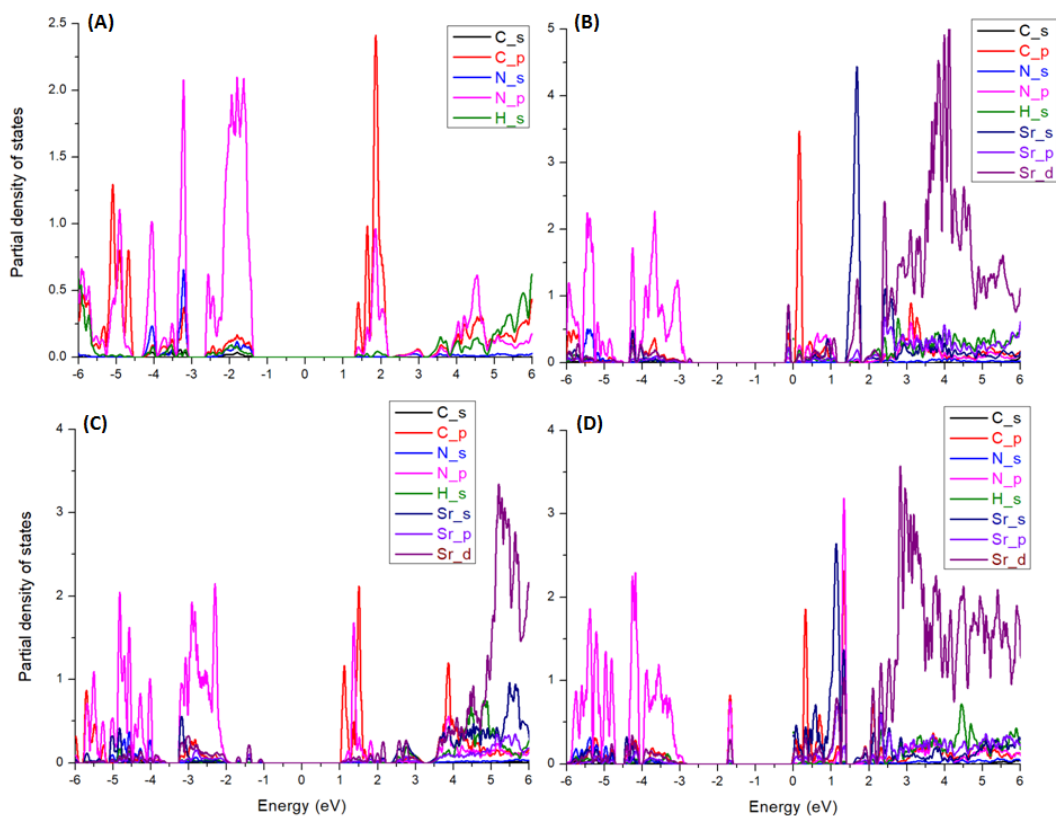

**Fig. S10** PDOS plots of pristine CN (a), 0.15Sr-CN (Interstitial site) doping (b), 0.15Sr-CN (C-substituted) doping (c), and 0.15Sr-CN (N-substituted) doping (d)

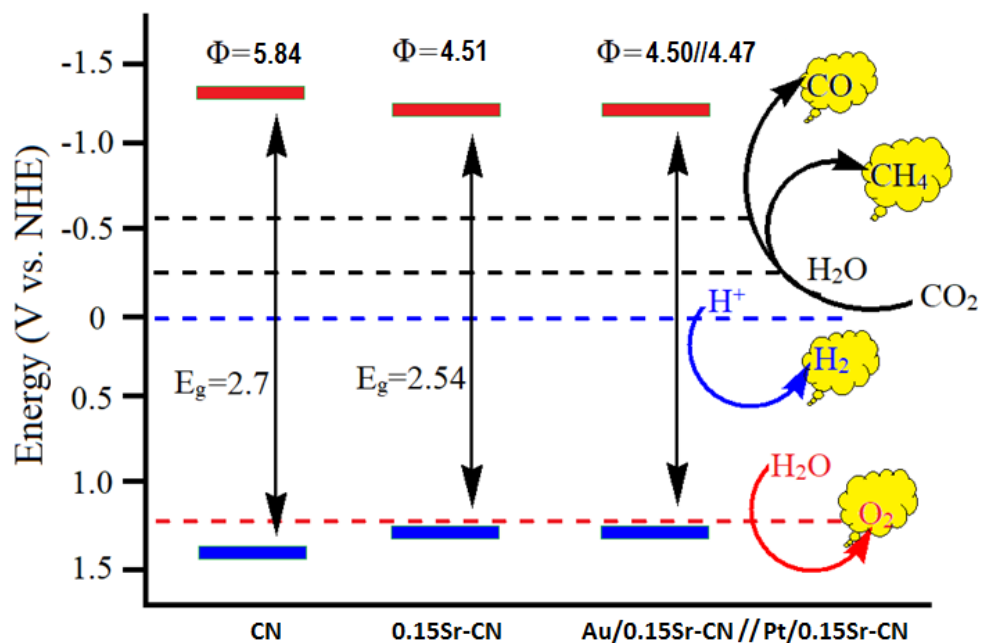

**Fig. S11** Energy band diagrams of the pristine CN, 0.15Sr-CN (interstitial), and Pt and Au deposited 0.15Sr-CN

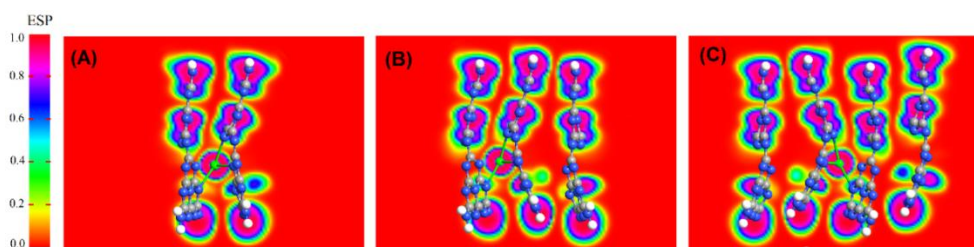

**Fig. S12** Average electron density difference map for Sr-incorporated two layers (a), three layers (b), and four layers of CN (c)

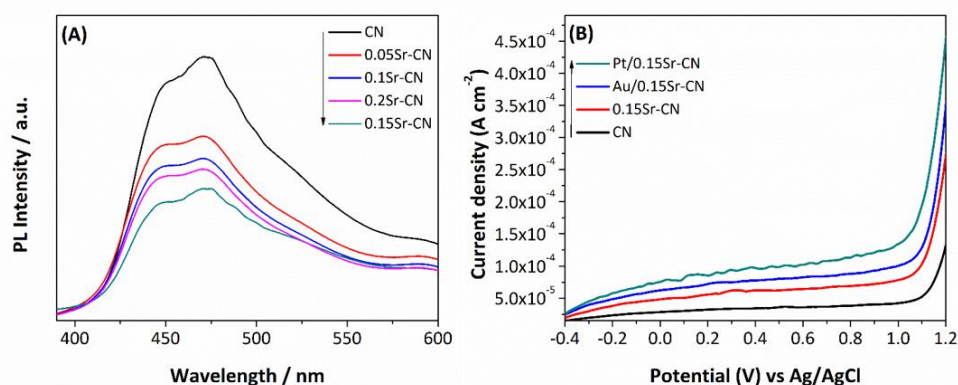

**Fig. S13** Photoluminescence (PL) spectra of CN and  $x$ Sr-CN samples (a), and photoelectrochemical  $I-V$  curves of CN, 0.15Sr-CN, Au/0.15Sr-CN and Pt/0.15Sr-CN samples (b)

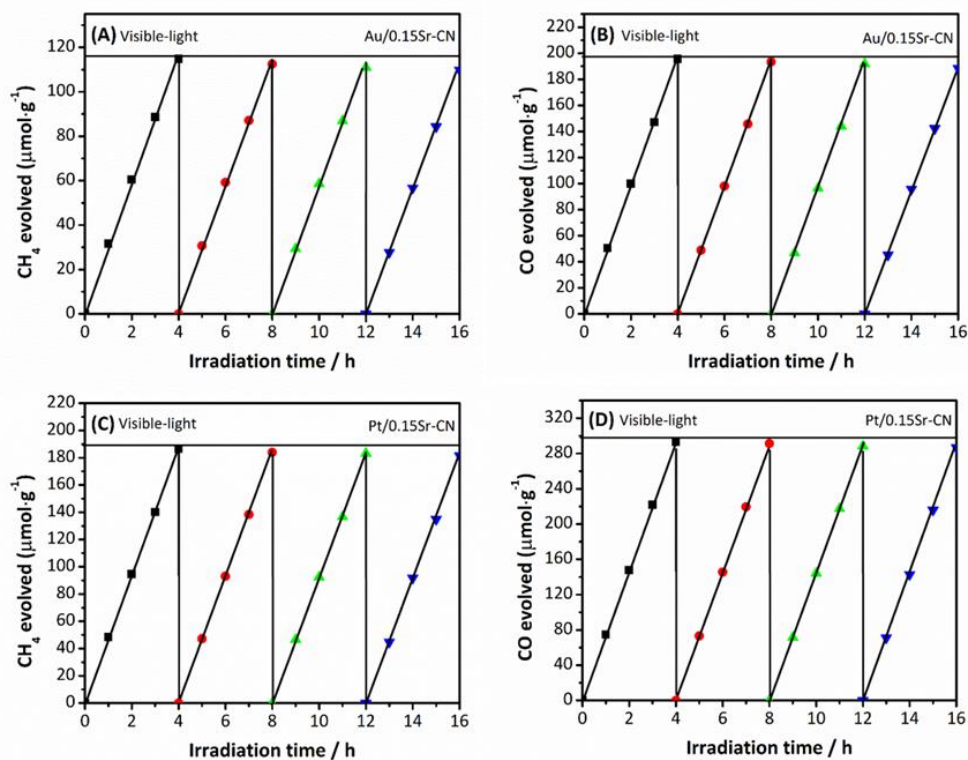

**Fig. S14** Photocatalytic recyclable tests for  $CO_2$  conversion to  $CH_4$  and CO products (a, b) over the Au/0.15Sr-CN catalyst and (c, d) over the Pt/0.15Sr-CN catalyst



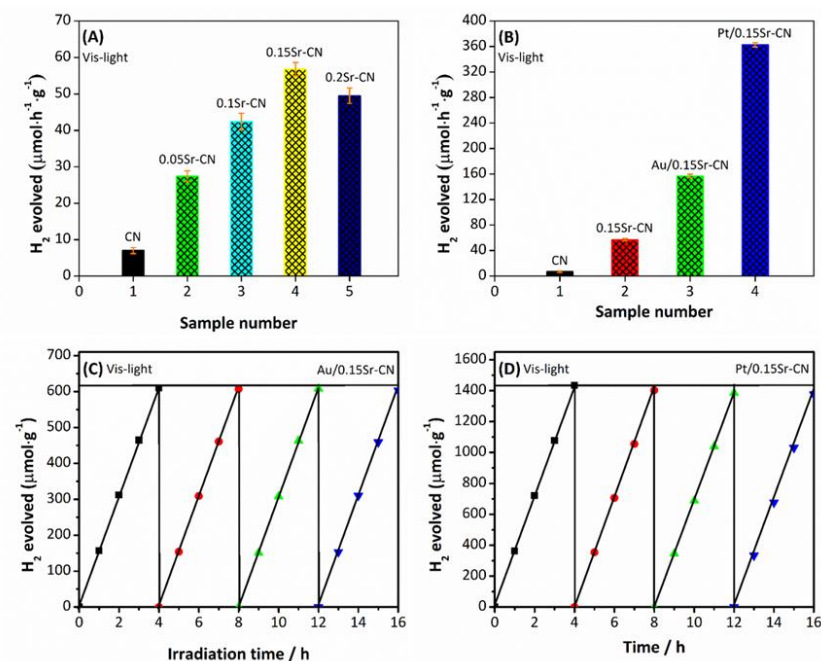

**Fig. S15** Visible light catalytic activities for H<sub>2</sub> evolution (a) of CN and xSr-CN samples (b) of CN, 0.15Sr-CN, Au/0.15Sr-CN and Pt/0.15Sr-CN samples. Photocatalytic recyclable tests for H<sub>2</sub> evolution (c) over the Au/0.15Sr-CN catalyst and (d) over the Pt/0.15Sr-CN catalyst

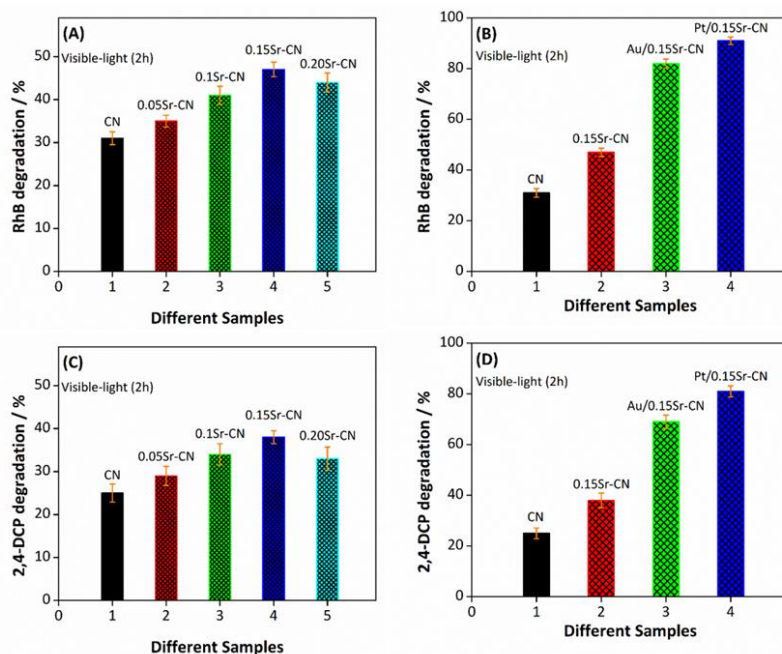

**Fig. S16** Visible light catalytic activities for RhB dye degradation (a) over CN and xSr-CN samples and (b) over CN, 0.15Sr-CN, Au/0.15Sr-CN and Pt/0.15Sr-CN samples. Visible light catalytic activities for 2,4-DCP degradation (c) over CN and xSr-CN samples and (d) over CN, 0.15Sr-CN, Au/0.15Sr-CN and Pt/0.15Sr-CN samples

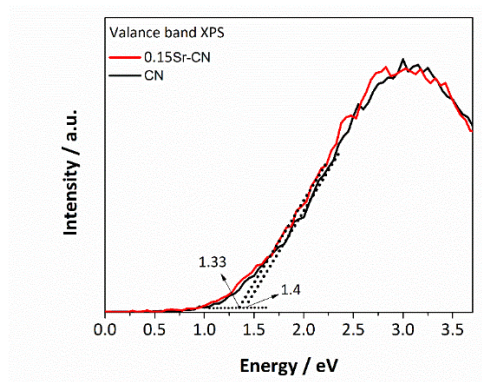

**Fig. S17** Valence band XPS spectra of CN and 0.15Sr-CN samples

**Table S1** Total free energies of pristine CN and Sr-doped CN species

| <i>Species</i>        | <i>Total free energies</i> |
|-----------------------|----------------------------|
| Pristine CN           | -15602.50103               |
| Sr-CN (Interstitial)  | -16534.02436               |
| Sr-CN (C-substituted) | -16371.92395               |
| Sr-CN (N-substituted) | -16251.95281               |

**Table S2** Work function, VBM, CBM, and band gap values in eV

| <i>Species</i>            | <i>Work functions</i> | <i>CBM</i> | <i>VBM</i> | <i>Bandgaps</i> |
|---------------------------|-----------------------|------------|------------|-----------------|
| CN                        | 5.84                  | -1.37      | 1.33       | 2.70            |
| Sr-CN<br>(Interstitial)   | 4.51                  | -2.74      | -0.19      | 2.55            |
| Sr-CN (C-<br>substituted) | 5.51                  | -1.08      | 1.05       | 2.13            |
| Sr-CN (N-<br>substituted) | 4.73                  | -2.87      | 0          | 2.87            |

## S2 Quantum Efficiency Calculations for CO<sub>2</sub> Conversion

The quantum efficiency of CN, 0.15Sr-CN, Au/0.15Sr-CN and Pt/0.15Sr-CN samples for CO<sub>2</sub> conversion was calculated at  $\lambda=420$  nm. The samples were irradiated with a 300 W Xe-lamp for 8 h. The average incident irradiation was determined to be 2.01 mW cm<sup>-2</sup> by the Newport (Oriel instrument USA model 91150V ser. No 391/0118) and area of the light collector part was 6.5 cm<sup>2</sup>. The amount of CH<sub>4</sub> produced over the CN,

0.15Sr-CN, Au/0.15Sr-CN and Pt/0.15Sr-CN samples at  $\lambda=420$  nm was 1.4, 2.6, 4.35, and 4.8  $\mu\text{mol}$ , respectively. While, the amount of CO produced over the over the CN, 0.15Sr-CN, Au/0.15Sr-CN and Pt/0.15Sr-CN samples under same wavelength was 1.78, 3.85, 5.65 and 6.5  $\mu\text{mol}$ , respectively. The calculations are given below.

Quantum efficiency calculation for CN, 0.15Sr-CN, Au/0.15Sr-CN and Pt/0.15Sr-CN photocatalysts at  $\lambda=420$  nm: Number of incident photons (N) in 8 h over 6.5  $\text{cm}^2$  area:

$$N = \frac{E\lambda}{hc} = \frac{2.01 \times 10^{-3} \times 6.5 \times 420 \times 10^{-9} \times 8 \times 3600}{6.626 \times 10^{-34} \times 3 \times 10^8} = 7.9 \times 10^{20}$$

$$QE = \frac{\{(2 \times \mu\text{mol of CO}) + (8 \times \mu\text{mol of CH}_4)\} \times \text{Avogadro number}}{\text{the number of incident photons}} \times 100$$

$$QE_{\text{CN}} = \frac{\{(2 \times 1.78 \times 10^{-6}) + (8 \times 1.4 \times 10^{-6})\} \times 6.02 \times 10^{23}}{7.9 \times 10^{20}} \times 100 = 0.85\%$$

$$QE_{0.15\text{Sr-CN}} = \frac{\{(2 \times 3.85 \times 10^{-6}) + (8 \times 2.6 \times 10^{-6})\} \times 6.02 \times 10^{23}}{7.9 \times 10^{20}} \times 100 = 1.58\%$$

$$QE_{\text{Au}/0.15\text{Sr-CN}} = \frac{\{(2 \times 5.65 \times 10^{-6}) + (8 \times 4.35 \times 10^{-6})\} \times 6.02 \times 10^{23}}{7.9 \times 10^{20}} \times 100 = 2.65\%$$

$$QE_{\text{Pt}/0.15\text{Sr-CN}} = \frac{\{(2 \times 6.5 \times 10^{-6}) + (8 \times 4.8 \times 10^{-6})\} \times 6.02 \times 10^{23}}{7.9 \times 10^{20}} \times 100 = 2.92\%$$

**Table S3** Comparison of our results for CO<sub>2</sub> conversion with the previous reports

| S.# | Photocatalysts                                        | Source of light | Wavelength used | Quantum efficiency (%) | Refs.                                                    |
|-----|-------------------------------------------------------|-----------------|-----------------|------------------------|----------------------------------------------------------|
| 1   | NiS <sub>2</sub> QDs-g-C <sub>3</sub> N <sub>4</sub>  | 300 Xe-lamp     | 420 nm          | 2.03%                  | Colloid. & Surf. A: Phys. & Eng. Asp. 600, 2020, 124912. |
| 2   | CdSe/P-CN                                             | 300 Xe-lamp     | 420 nm          | 2.57%                  | Appl. Catal., B: Environ. 270, 2020, 118867              |
| 3   | SnO <sub>2</sub> /B, P-gC <sub>3</sub> N <sub>4</sub> | 300 Xe-lamp     | 420 nm          | 2.02%                  | Appl. Catal., B: Environ. 201, 2017, 486-494.            |
| 4   | Pt/0.15Sr-CN                                          | 300 Xe-lamp     | 420 nm          | 2.92%                  | Current work                                             |
